# Supplementary material
Source: PubMed Central journal article supplement (PMC2922283)
Supplement: 1009428107_pnas.201009428SI.pdf [file 1009428107_pnas.201009428SI.pdf]

# Supporting Information

Wang et al. 10.1073/pnas.1009428107

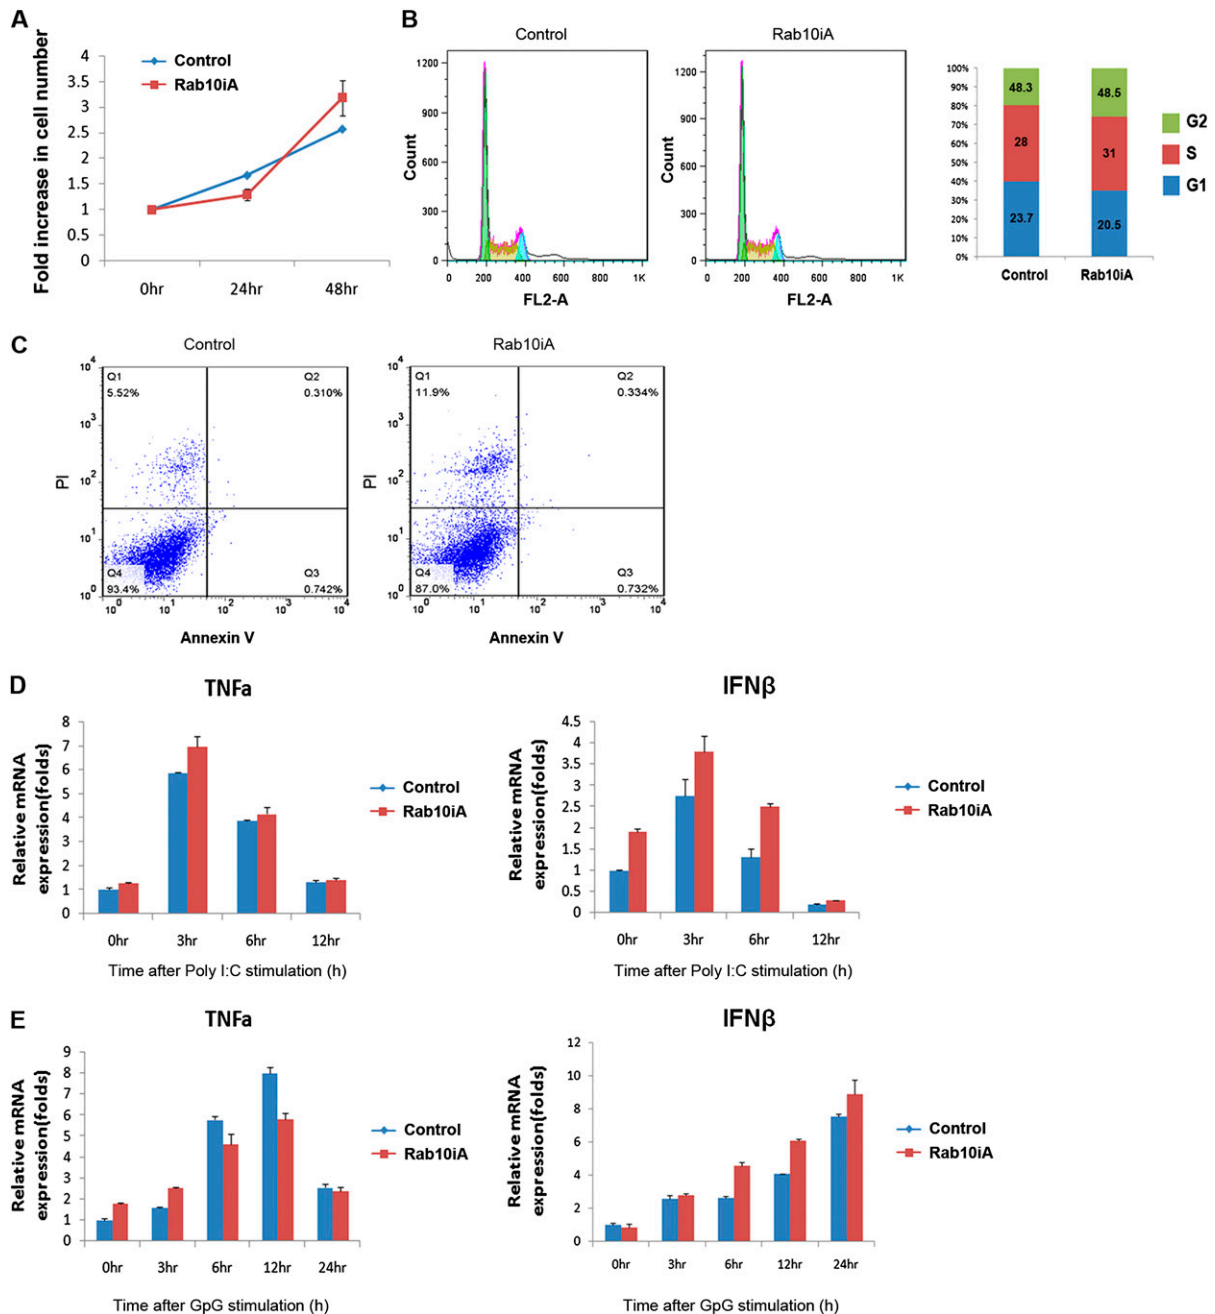

**Fig. S1.** Rab10 knockdown does not affect the viability of macrophages and cytokine production induced by Poly I:C and CpG. (A) For measuring the proliferation of the cells, Rab10 knockdown RAW264.7 cells and cells transfected with empty vector were cultured in complete cell culture medium; cell numbers were counted after different time period as indicated. (B) Typical flow cytometric analysis of the cell cycle: RAW264.7 cells stably transfected with Rab10iA or vector plasmid were stained with propidium iodide (PI) and analyzed using flow cytometry; respective percentages of G1, S, and G2 phase cells were analyzed by Flowjo software. (C) Apoptosis analysis: Rab10 knockdown RAW264.7 cells and control cells were stained with Annexin V and PI and assayed by flow cytometry. (D and E) RAW264.7 cells stably transfected with Rab10iA or vector plasmid were stimulated with 10  $\mu$ g/ml poly I:C (D) or 0.3  $\mu$ M CpG (E) for the indicated time periods. Relative mRNA expression of TNF- $\alpha$  and IFN- $\beta$  was measured by quantitative PCR.







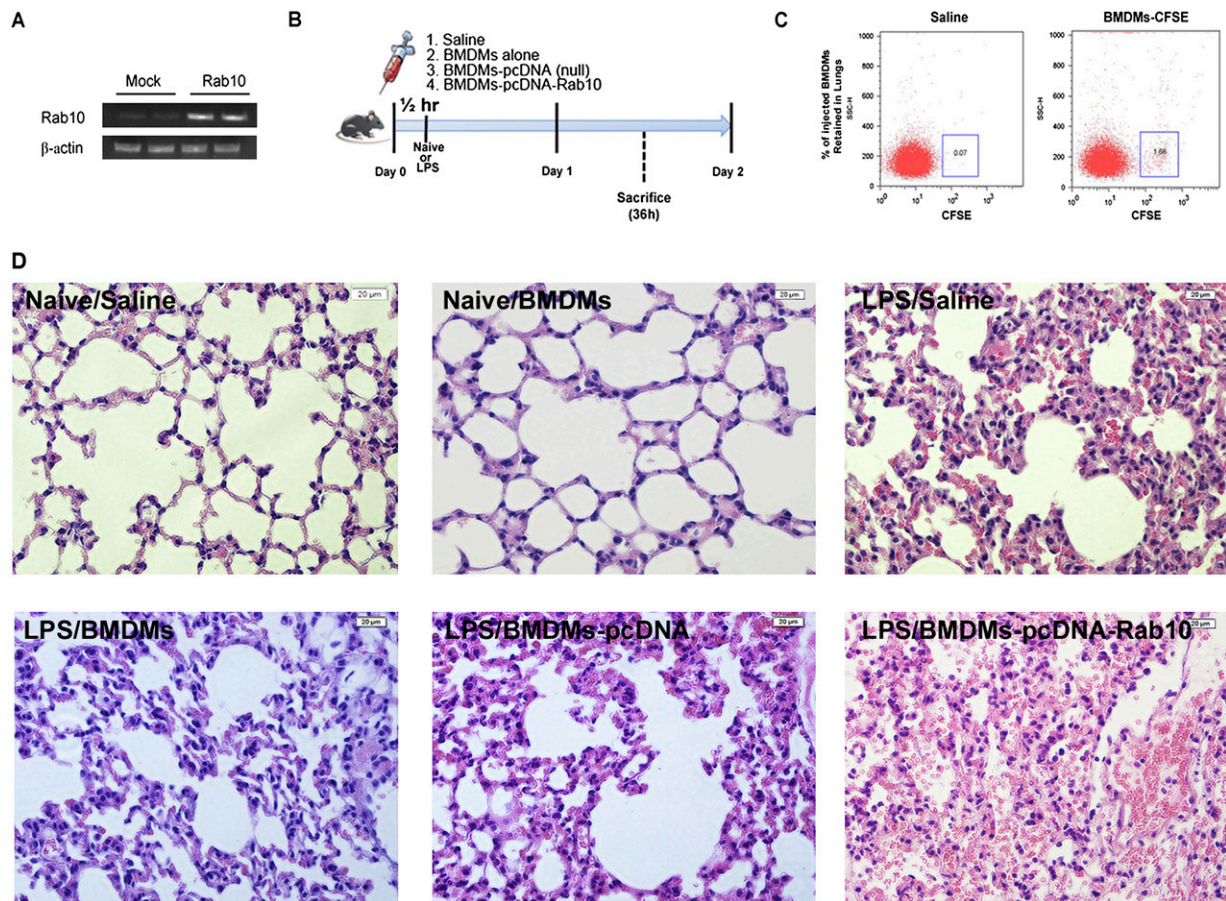

**Fig. 55.** Adoptive transfer of BMDMs-Rab10 aggravated LPS-induced lung injury in mice by histological analysis. (A) BMDMs were transiently transfected with plasmids encoding Rab10 or mock vector. The efficiency of transfection was evaluated by RT-PCR. (B) Female mice at 6–10 wk were divided into six groups ( $n = 6, 5, 7, 5, 7, 6$ , respectively). Saline, BMDMs, BMDMs transfected with pcDNA3.1, or pcDNA3.1-mRab10 plasmid ( $2 \times 10^6$  cells,  $200 \mu\text{L}$  total volume each) were infused via a jugular venous canula 30 min before LPS challenge. Mice were then anesthetized and endotracheally intubated with  $1.5 \text{ mg/mL}$  LPS or saline. Mice were killed after 36 h to evaluate pulmonary inflammation. (C) To ensure the infiltration of injected macrophages to the lung, carboxyfluorescein diacetate succinimidyl ester (CFSE) was used to label BMDMs before injection into animals. Lung lobes were enzyme-digested into single cells before CFSE-labeled BMDMs were counted by flow cytometry. (D) Lung tissues fixed in 4% paraformaldehyde, embedded in paraffin, were cut into  $5\text{-}\mu\text{m}$  thick sections before staining with H&E (Beyotime), followed by microscopy analysis with an Olympus TH4-200 microscope using a  $40\times$  objective. Lung pathology was evaluated blindly by a pathologist according to four criteria: alveolar congestion, hemorrhage, infiltration or aggregation of neutrophils in airspaces or vessel walls, and thickness of alveolar wall/hyaline membrane formation. Representative images of H&E stained lung sections from six experimental groups are shown. Lungs were fixed with 4% paraformaldehyde, embedded in paraffin, and then cut into  $5\text{-}\mu\text{m}$ -thick sections before staining. Photomicrographs were obtained with an Olympus TH4-200 microscope with a  $40\times$  objective. (Scale bar =  $20 \mu\text{m}$ .)
